# Supplementary material for: Mire edge is not a marginal thing: Assessing the factors behind the formation, vegetation succession, and carbon balance of a subarctic fen margin
Source: Copernicus journal article supplement (doi:10.5194/egusphere-2024-2102), 2024-07-24
Supplement: Supplementary file 1 [file egusphere-2024-2102-supplement.pdf]

## Comparison profiles

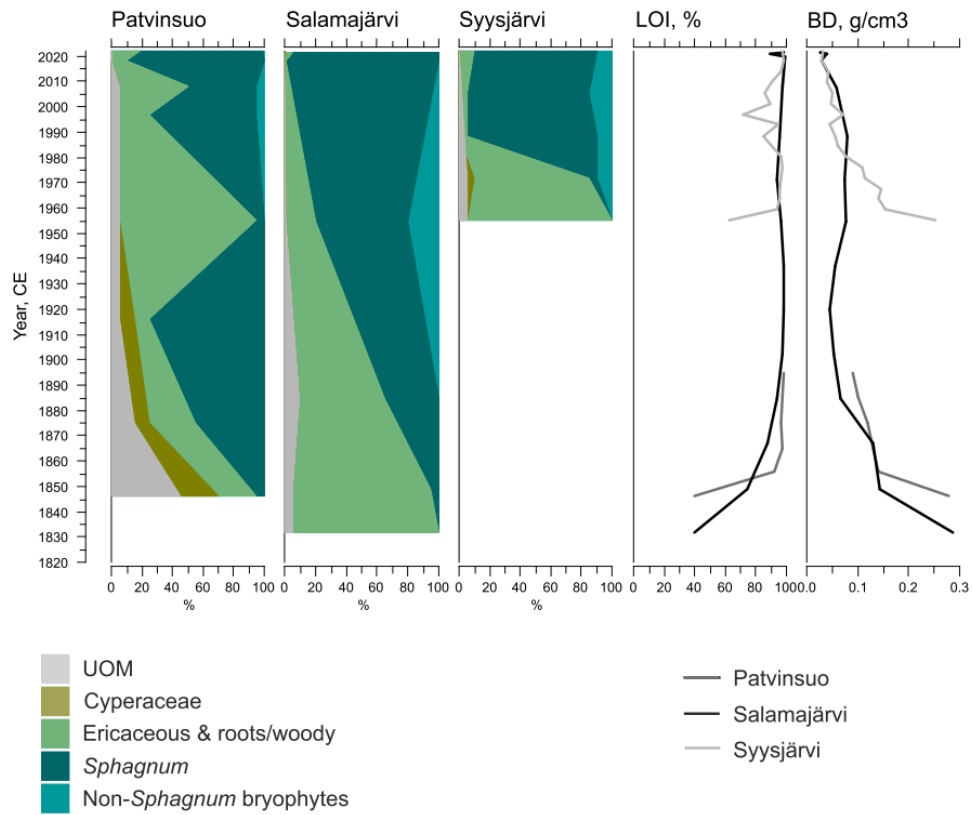

Supplementary figure 1. Fossil plant records (left) including undetected organic matter (UOM) and loss of ignition (LOI) and bulk density (BD) for supplementary profiles. Proportion of vegetation type and LOI in percentages (%), unit for bulk density is g/cm<sup>3</sup>.

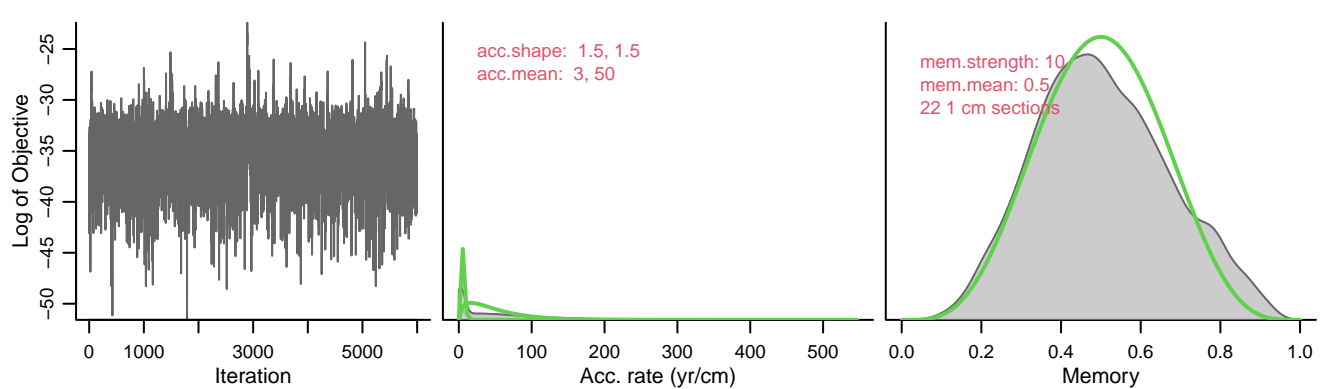

Supp. fig. 2A  
LVT1S1

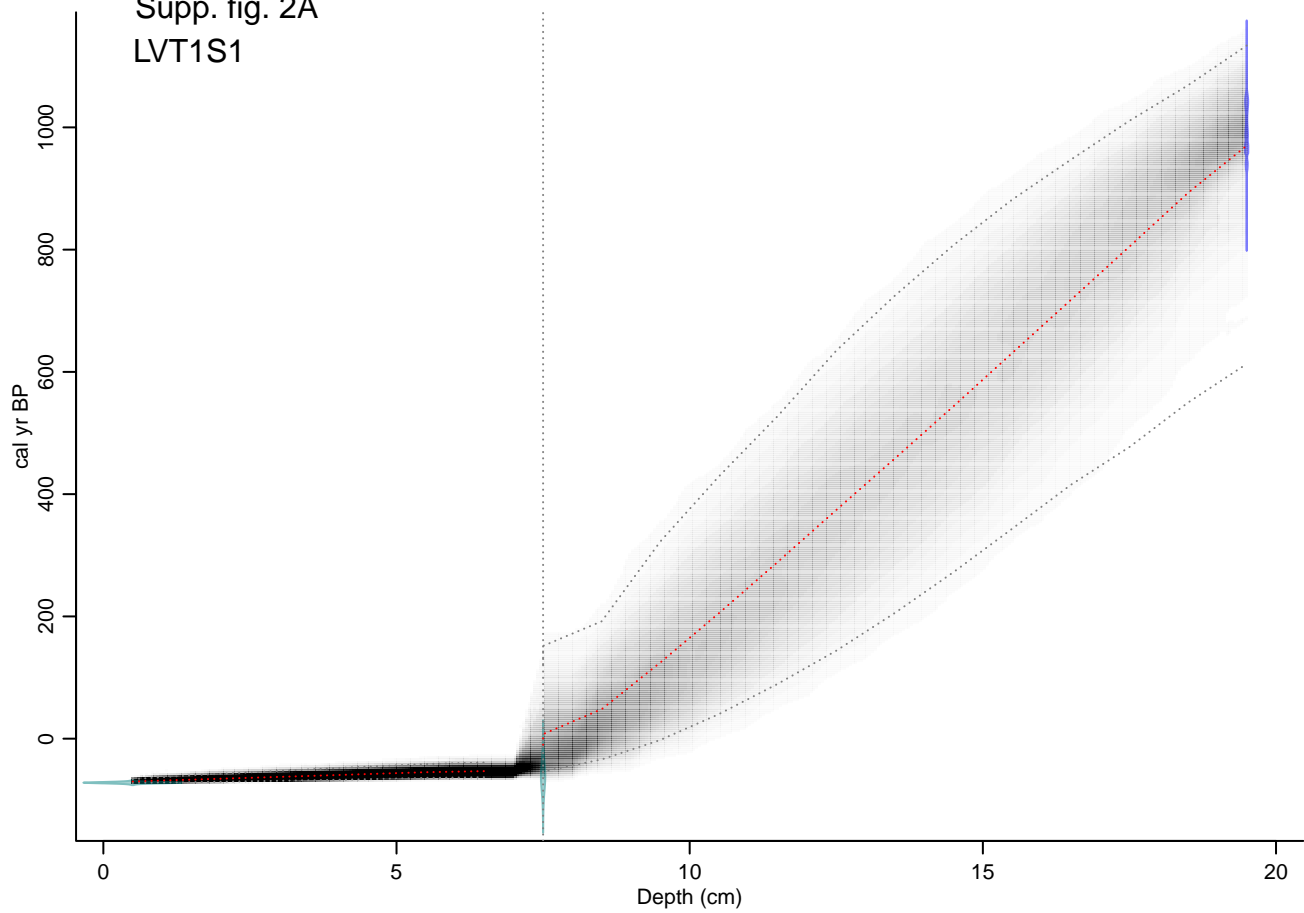

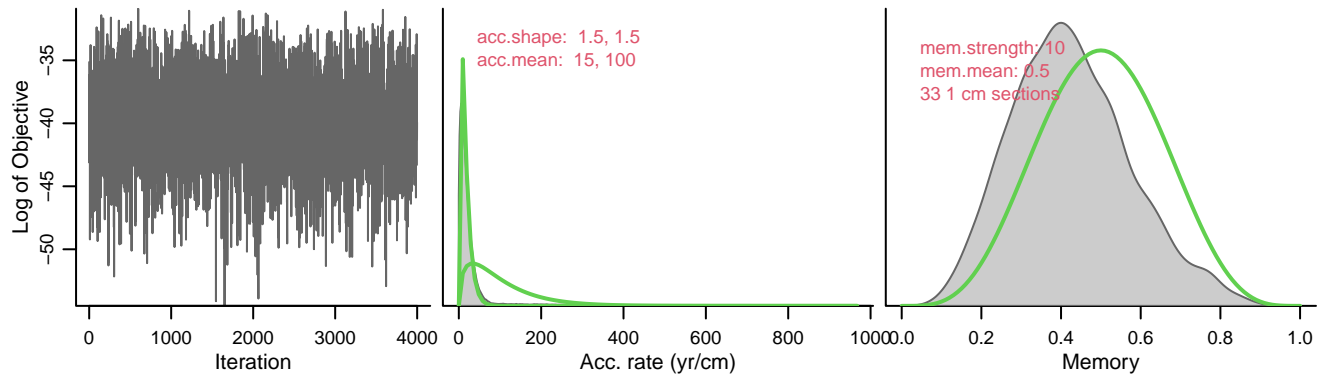

Supp. fig. 2B

LVT1S2

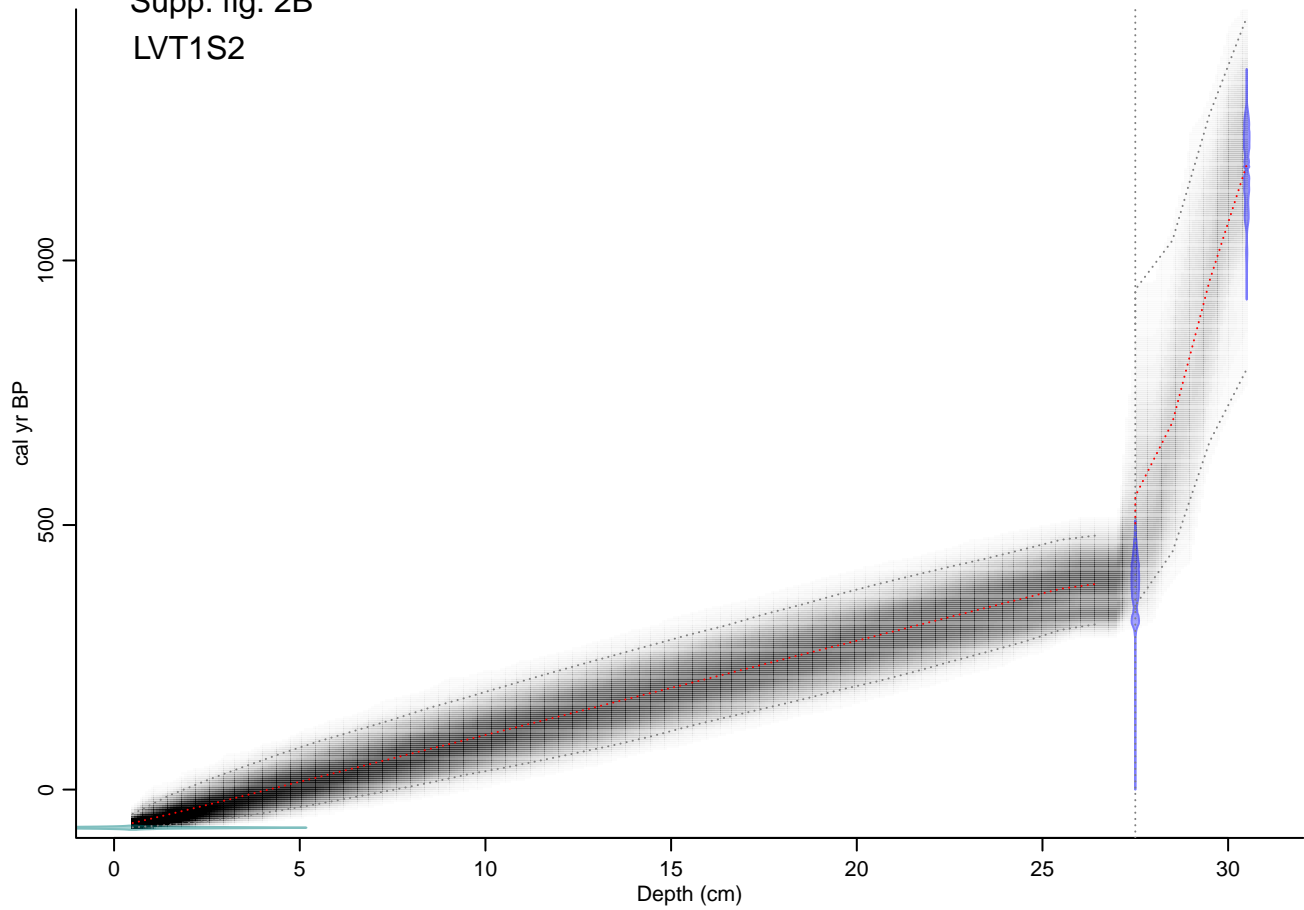

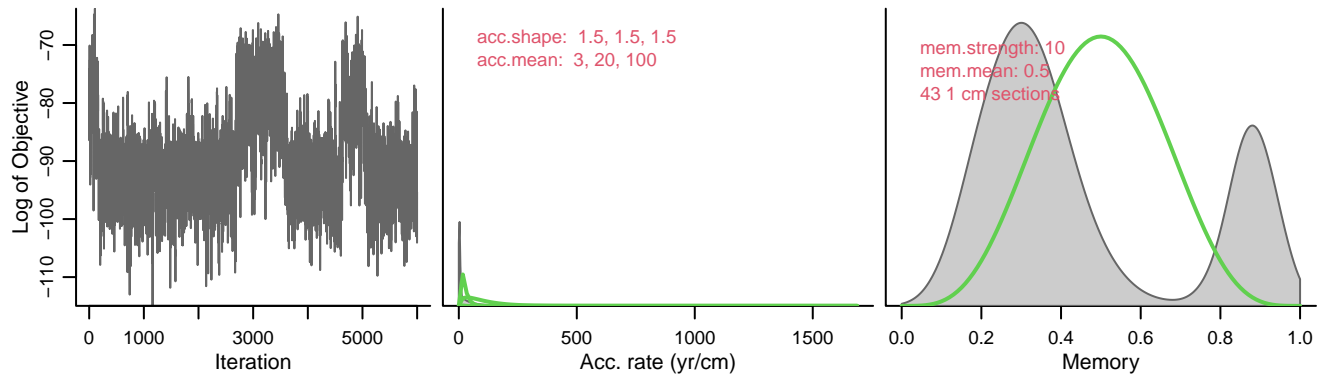

Supp. fig. 2C

LVT1S3

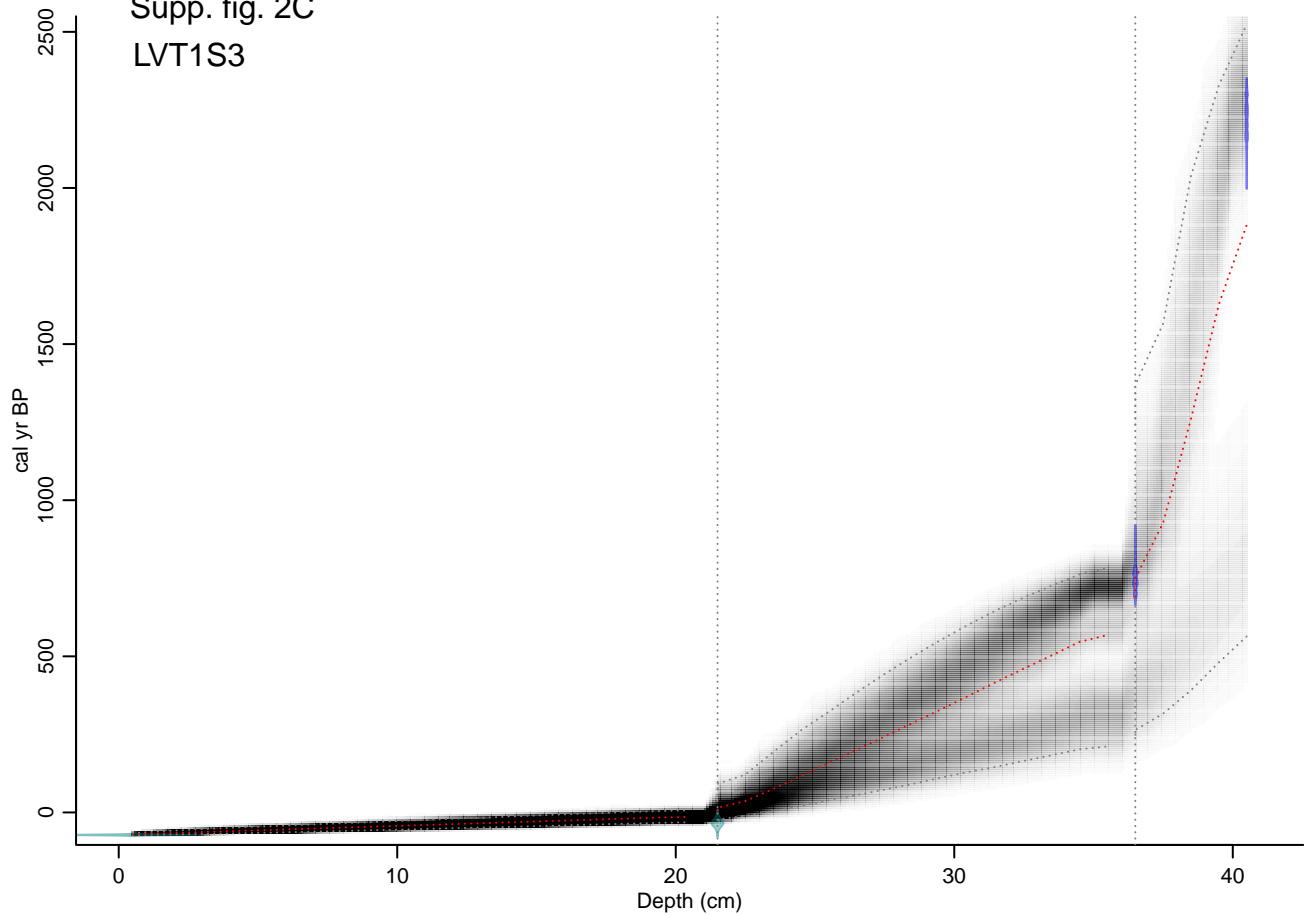

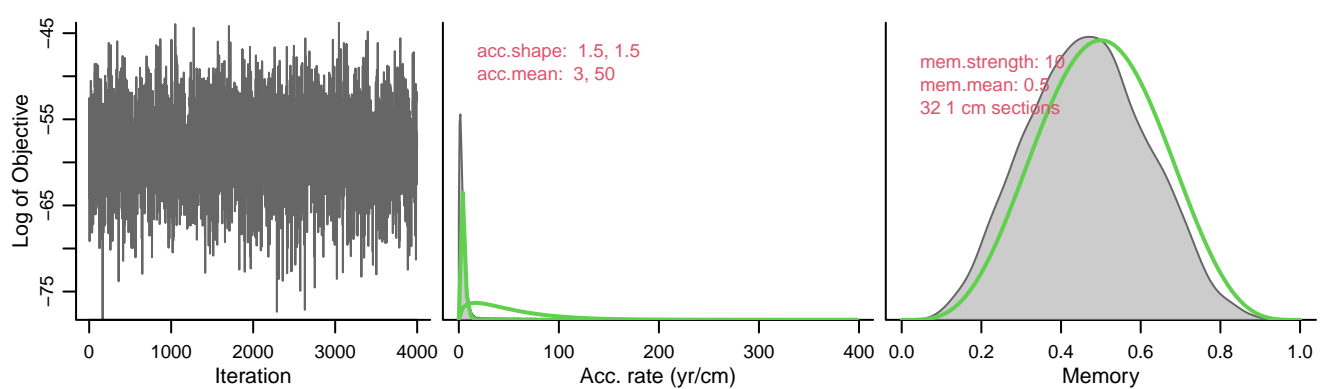

Supp. fig 2D

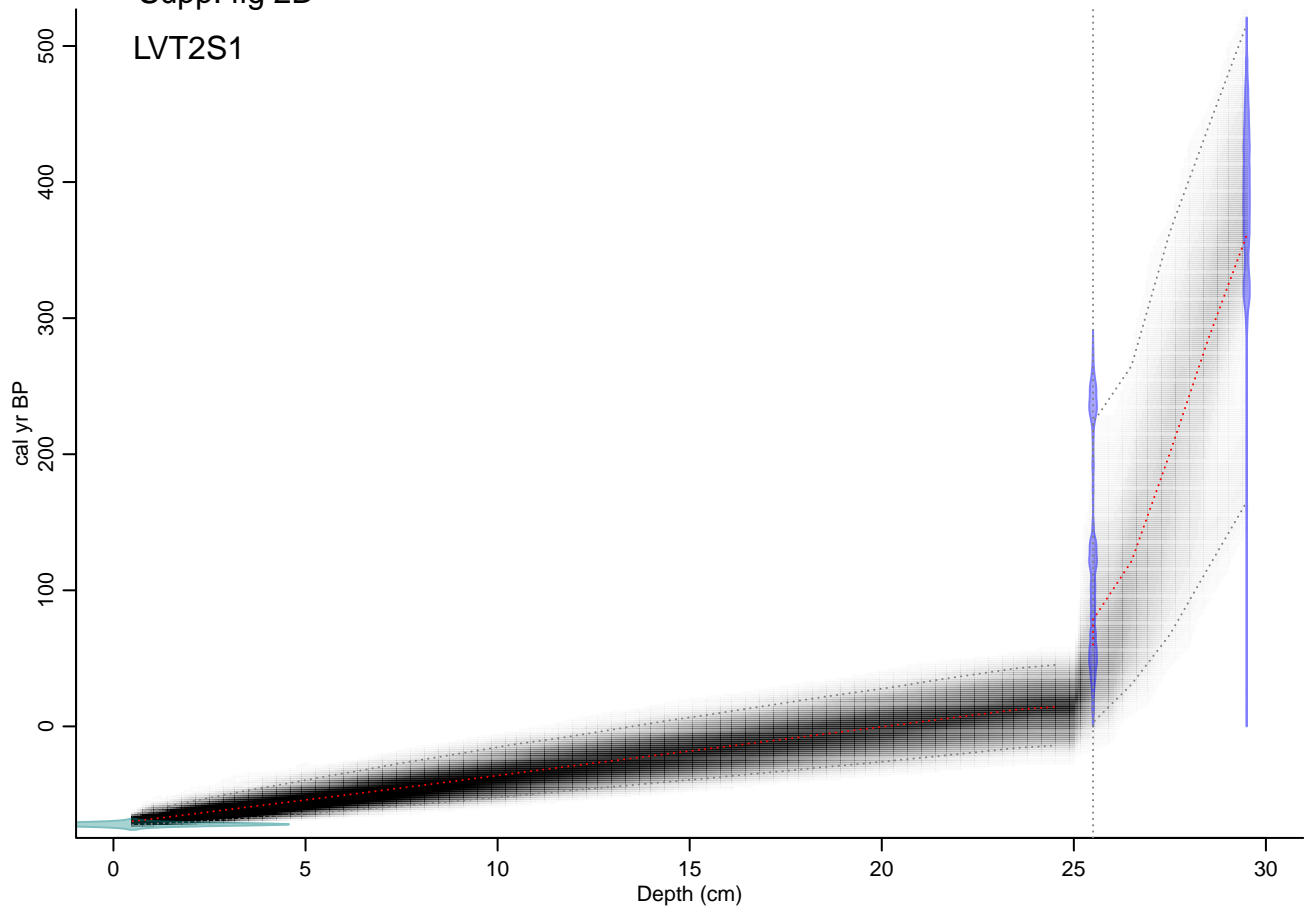

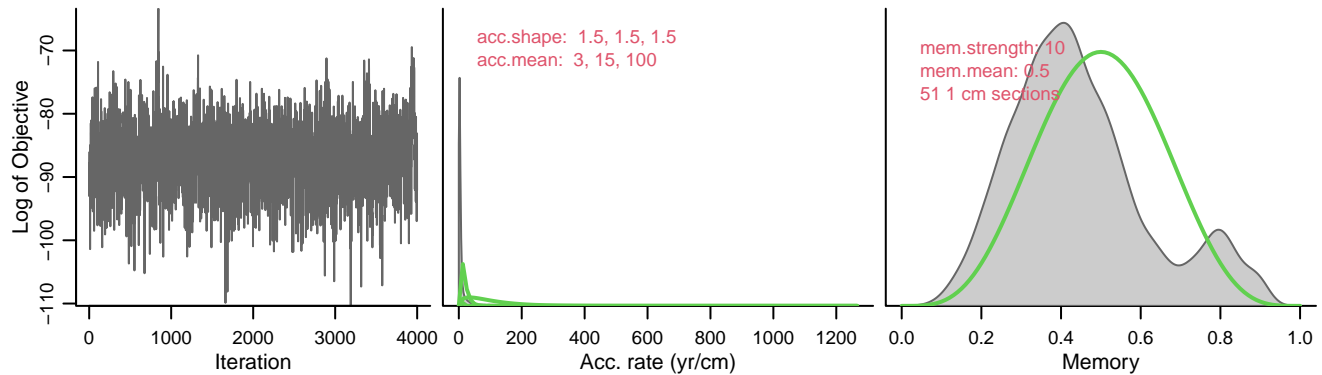

Supp. fig 2E

LVT2S2

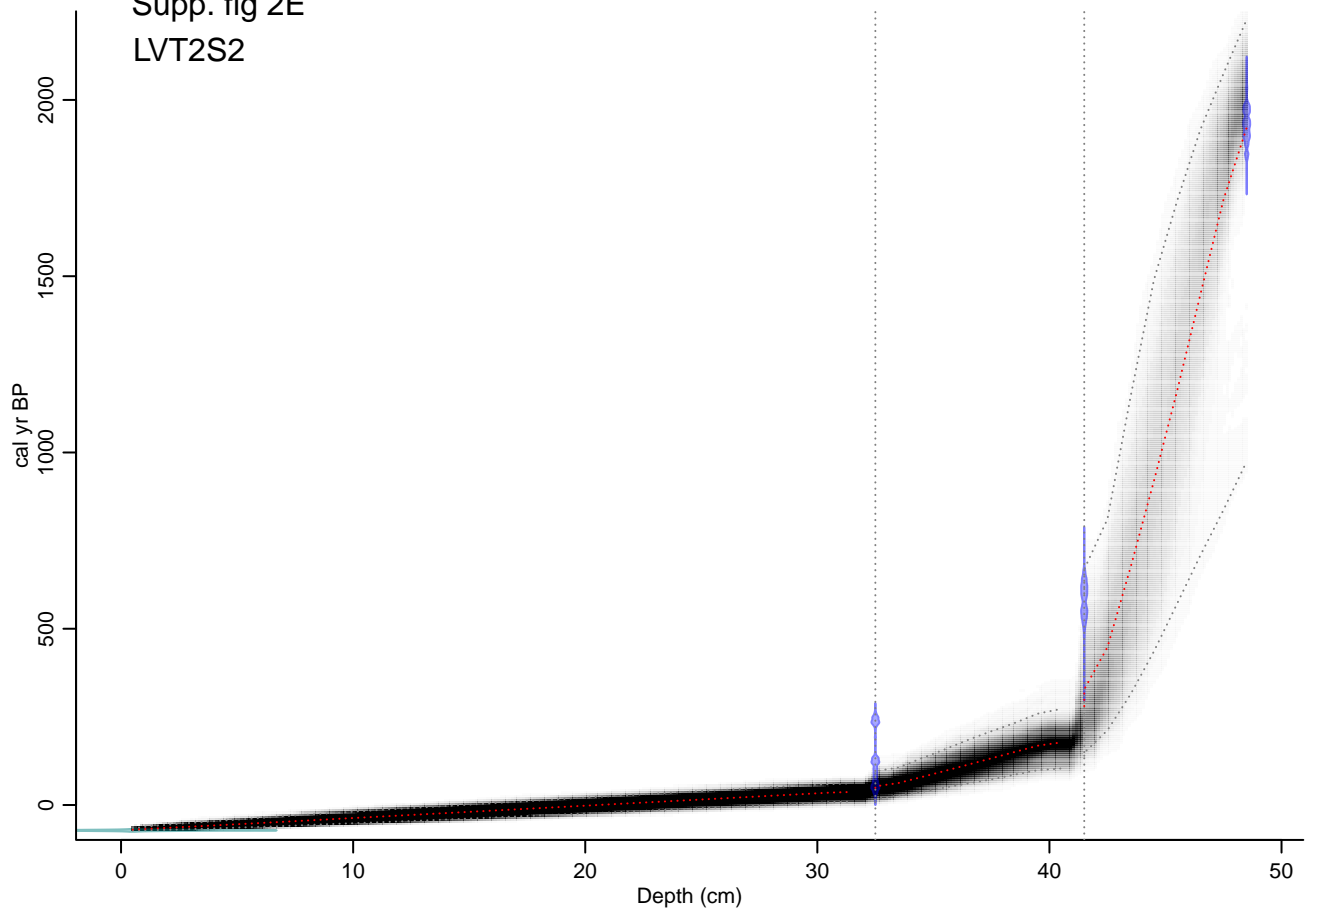

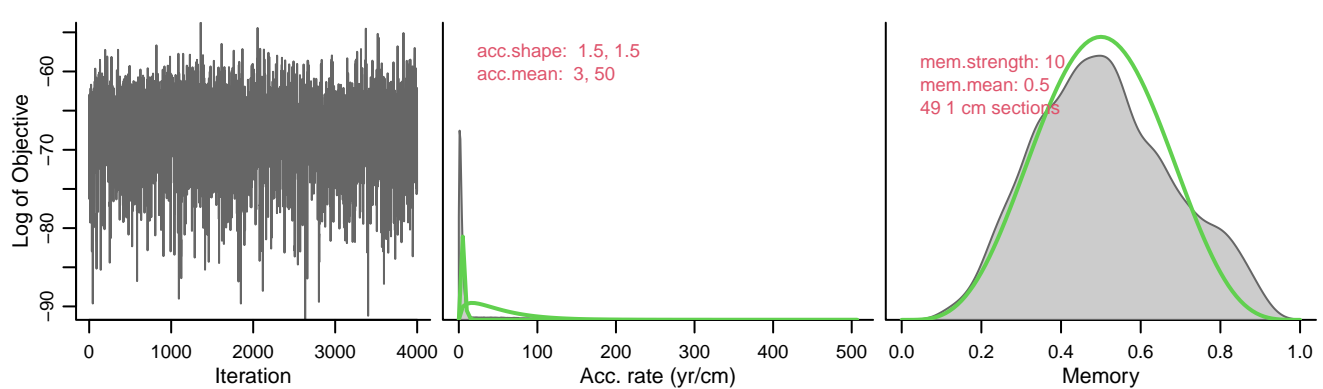

Supp. fig. 2F

LVT2S3

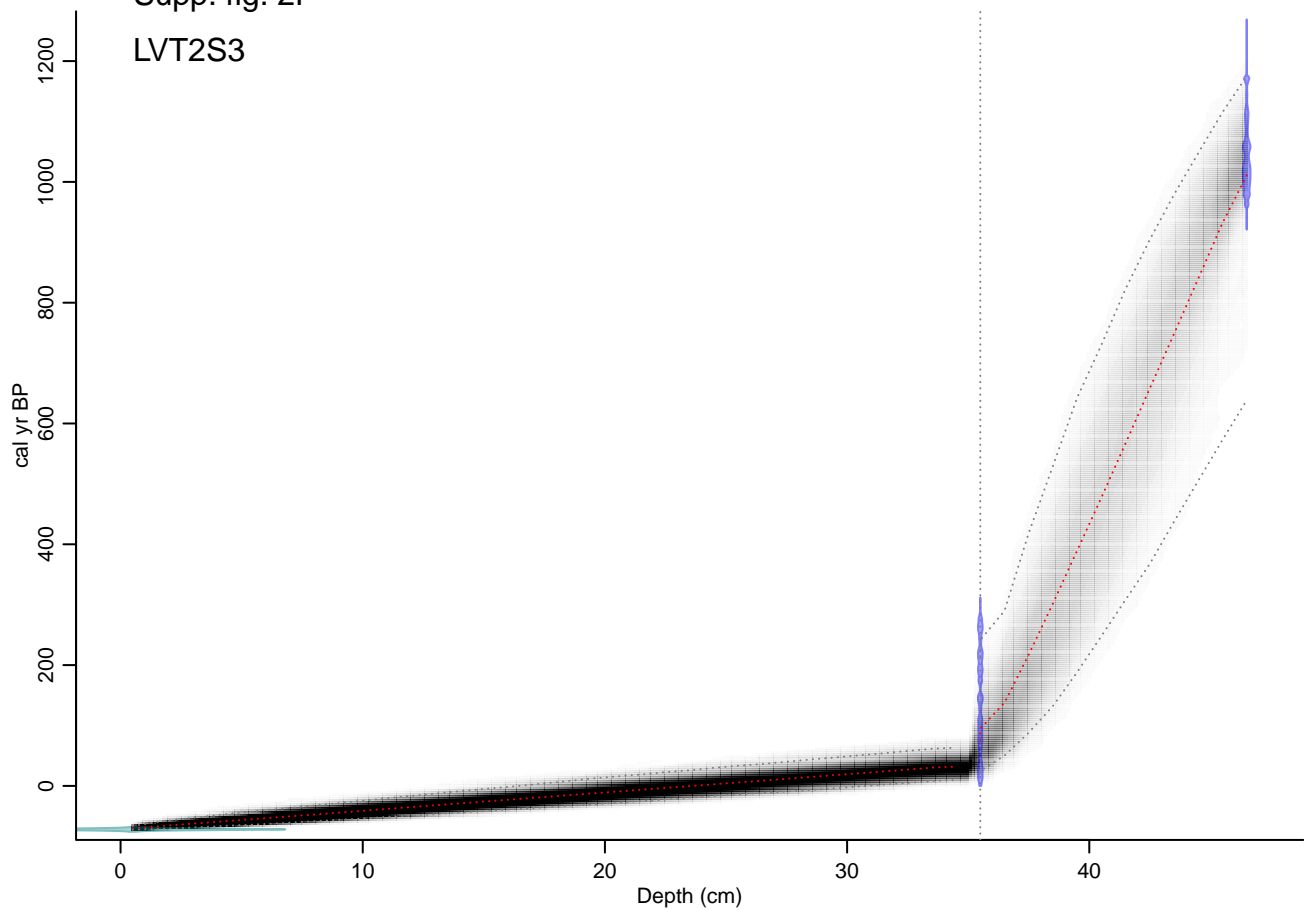

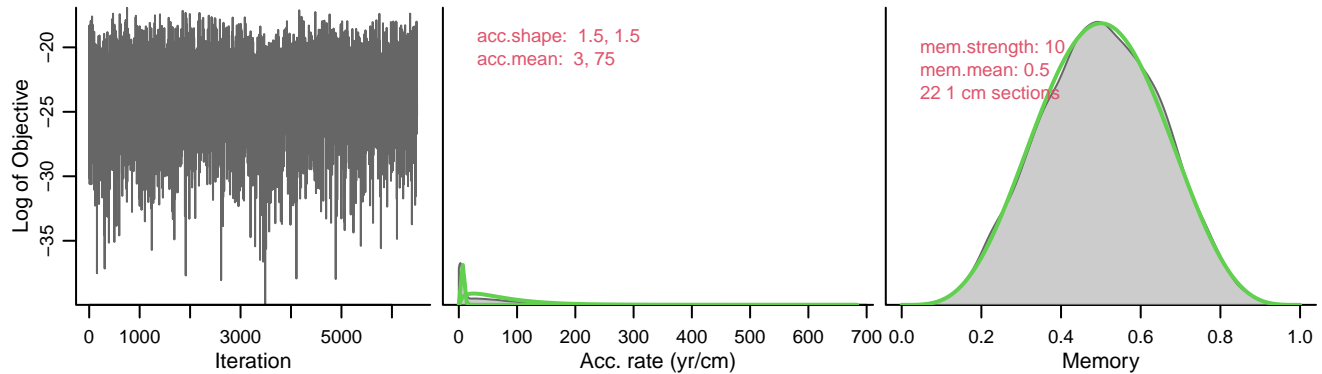

Supp. fig. 2G

LVT3S1

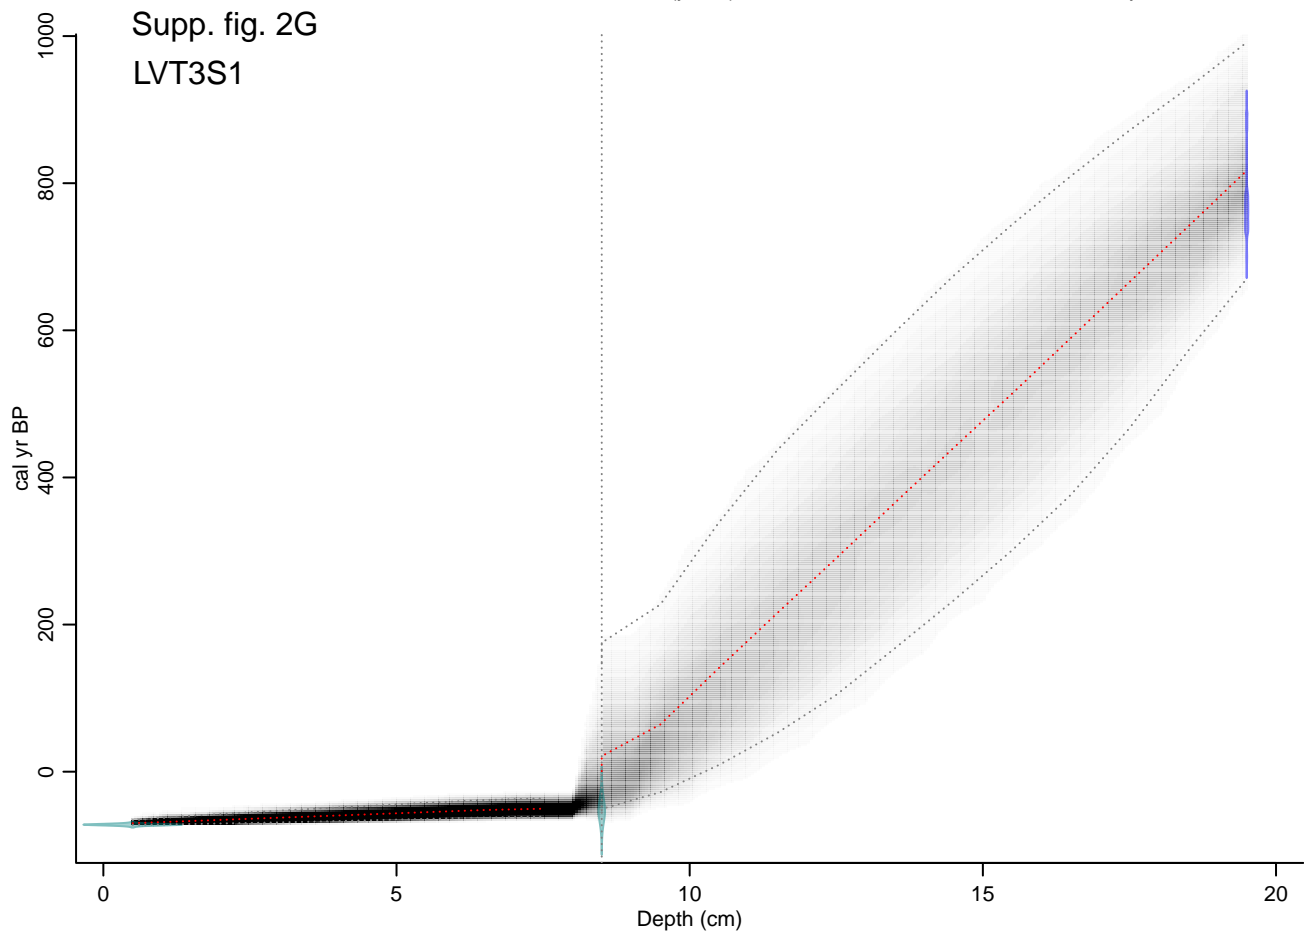



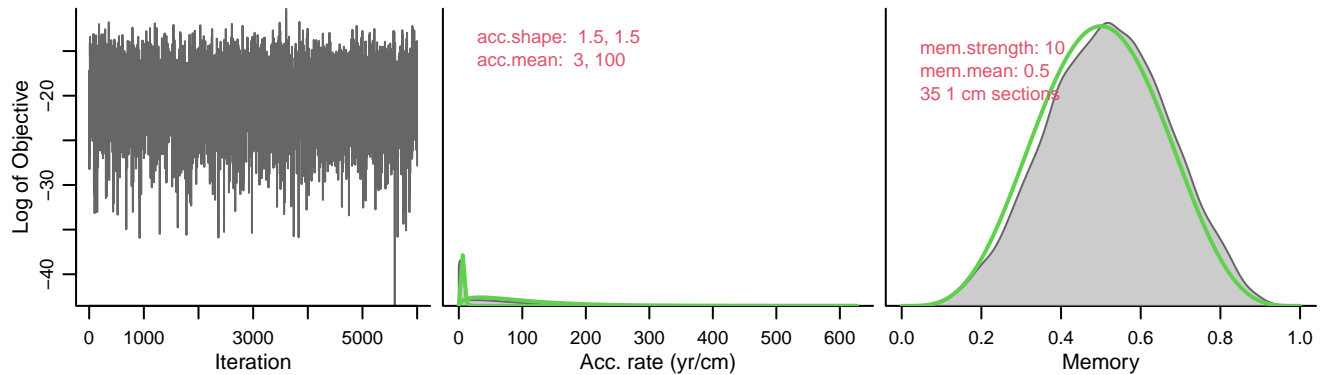

Supp. fig. 2H

LVT3S2

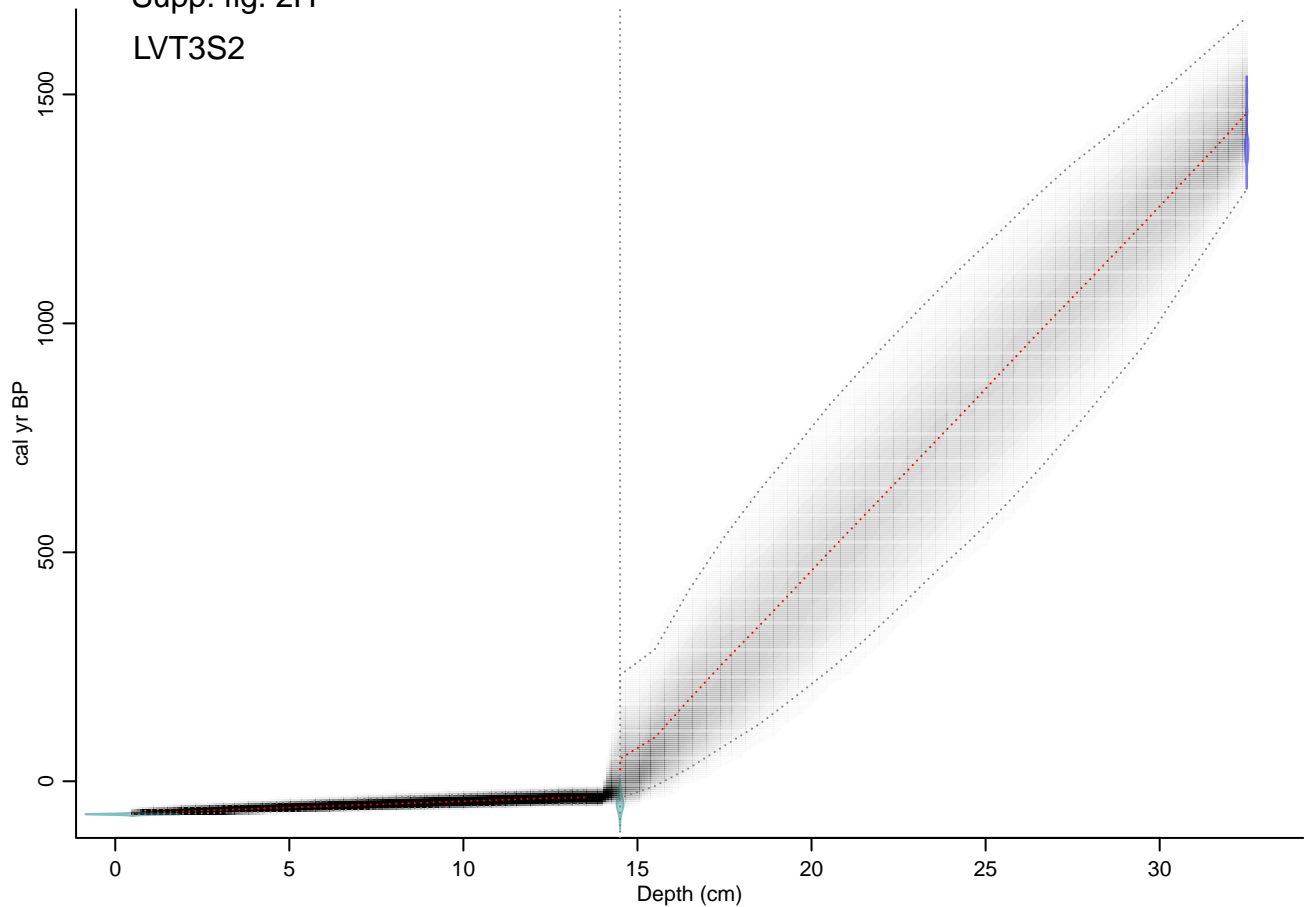

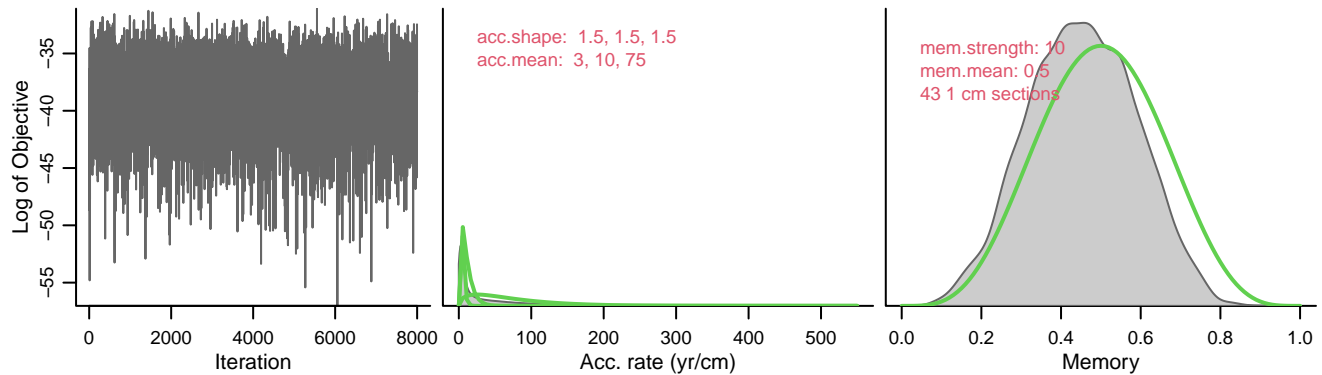

Supp. fig. 2I

LVT3S3

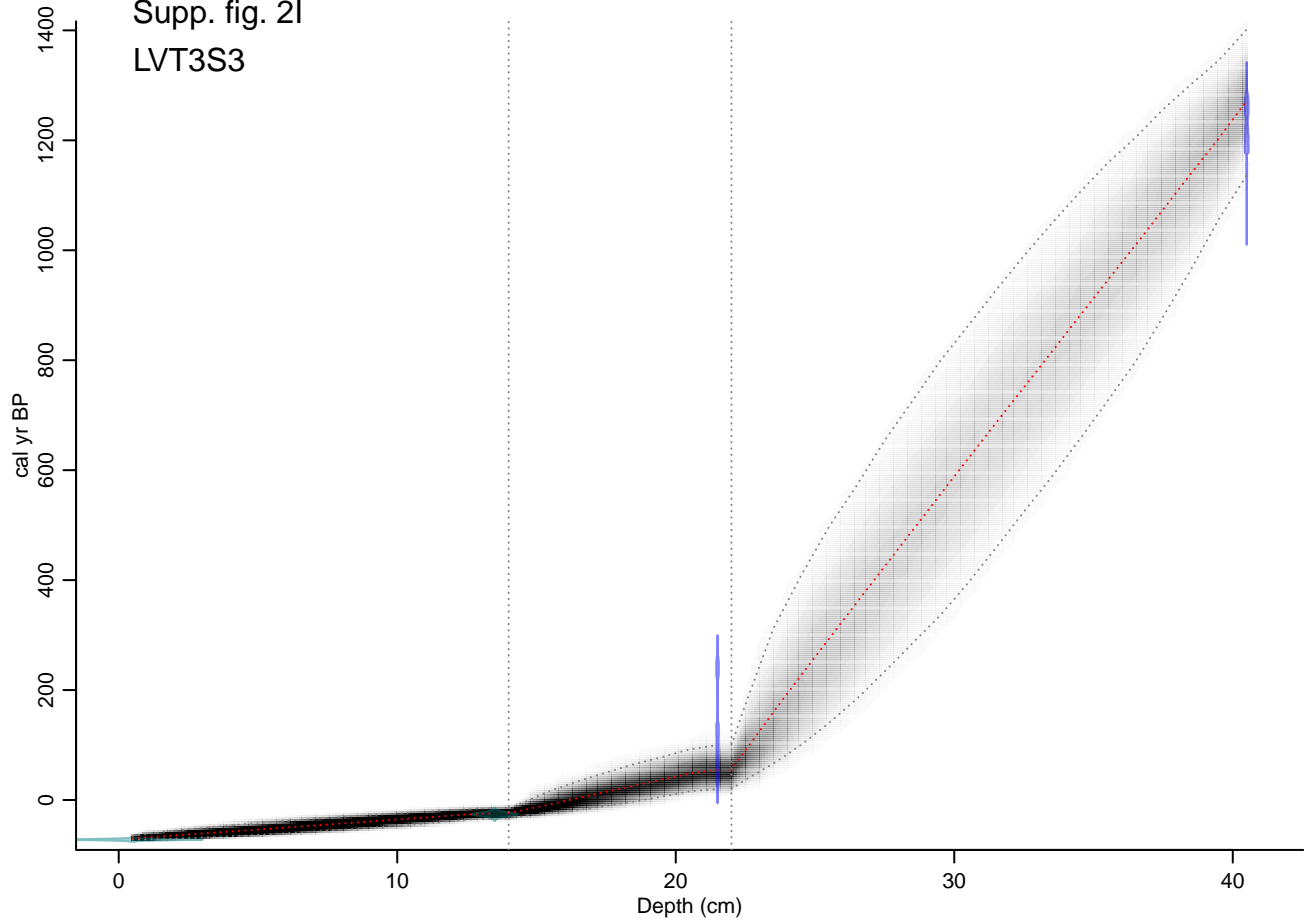

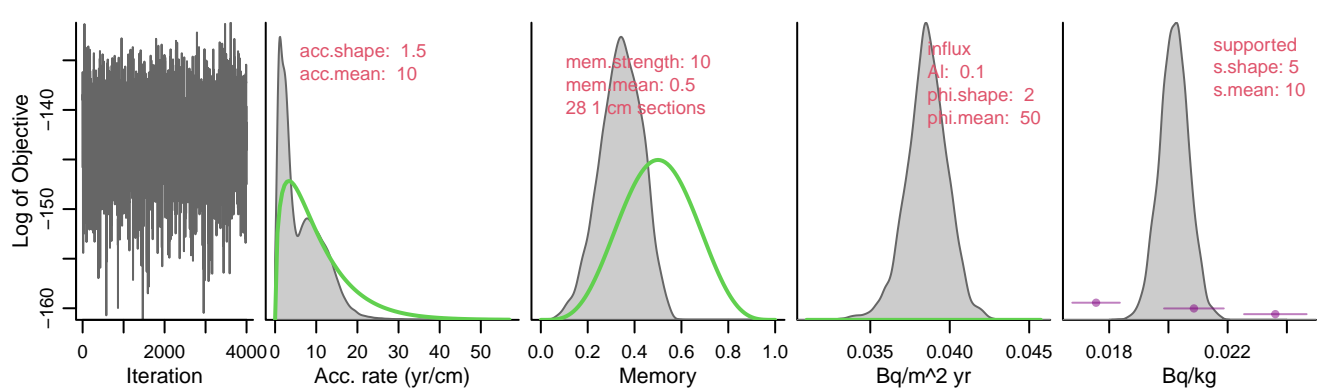

Supp. fig. 2J

PST1Sm

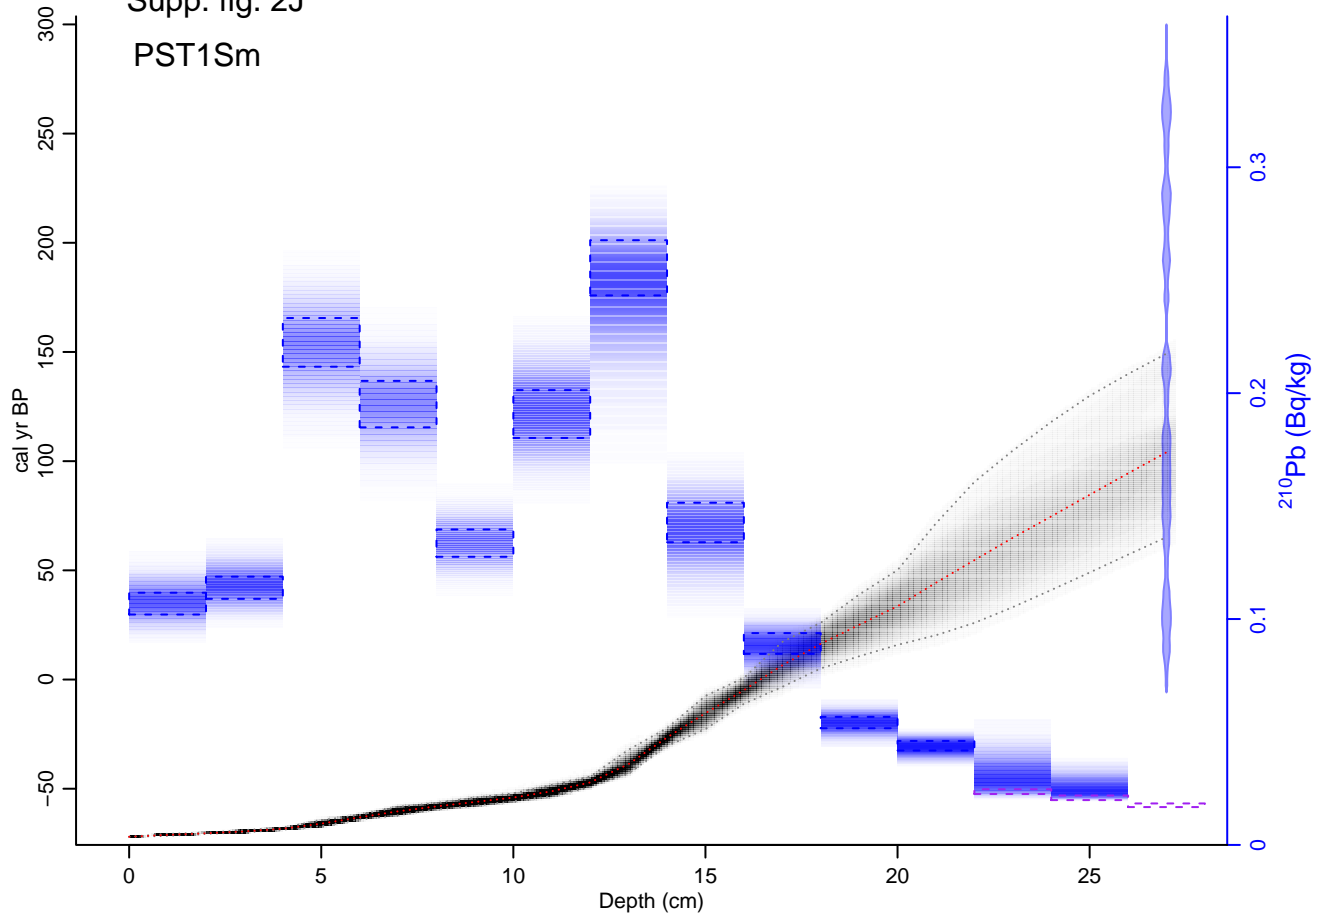

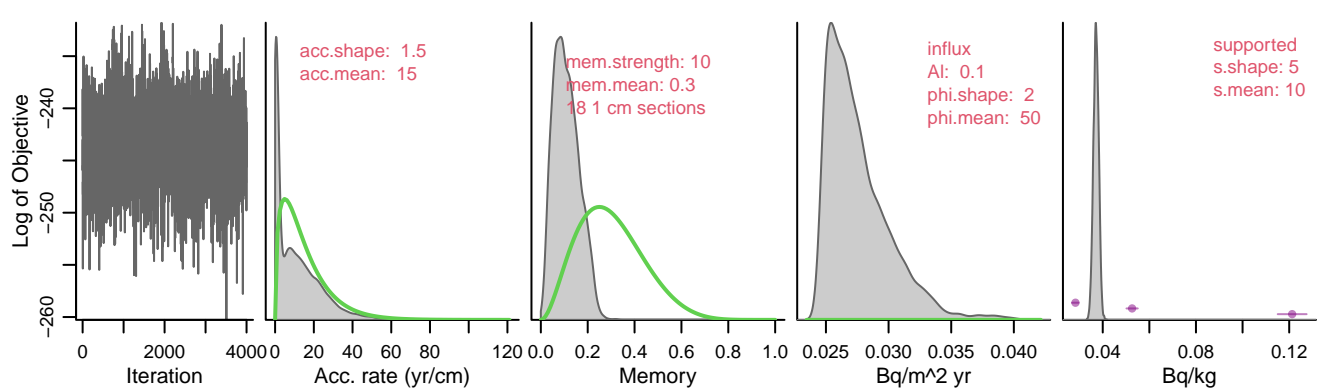

Supp. fig. 2K

SJT3Sm

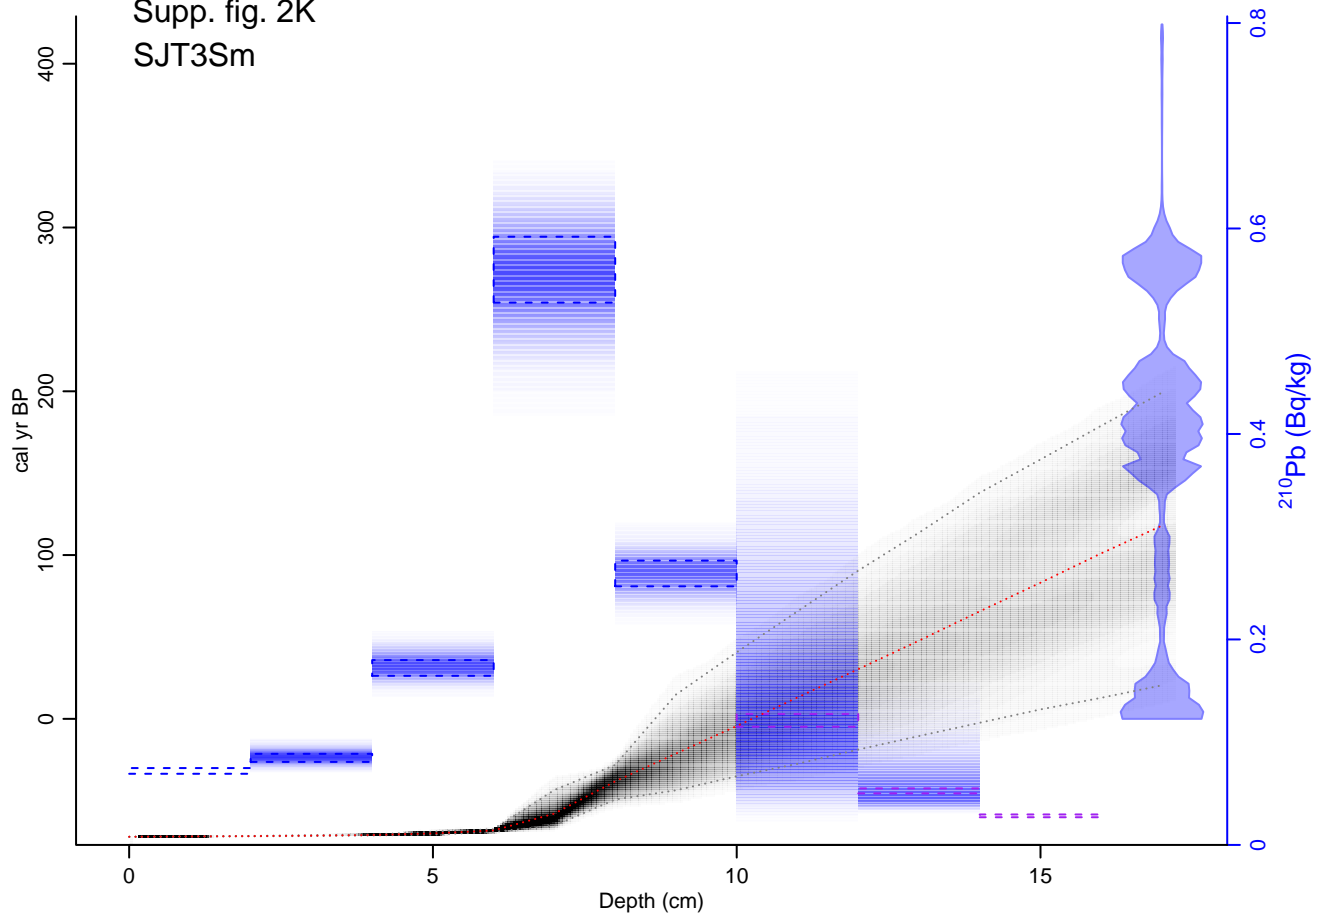

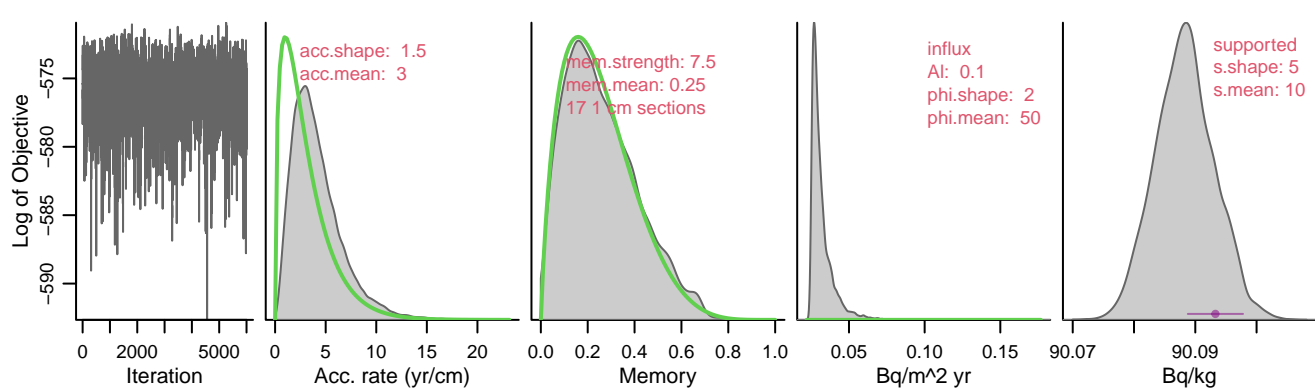

Supp. fig. 2L

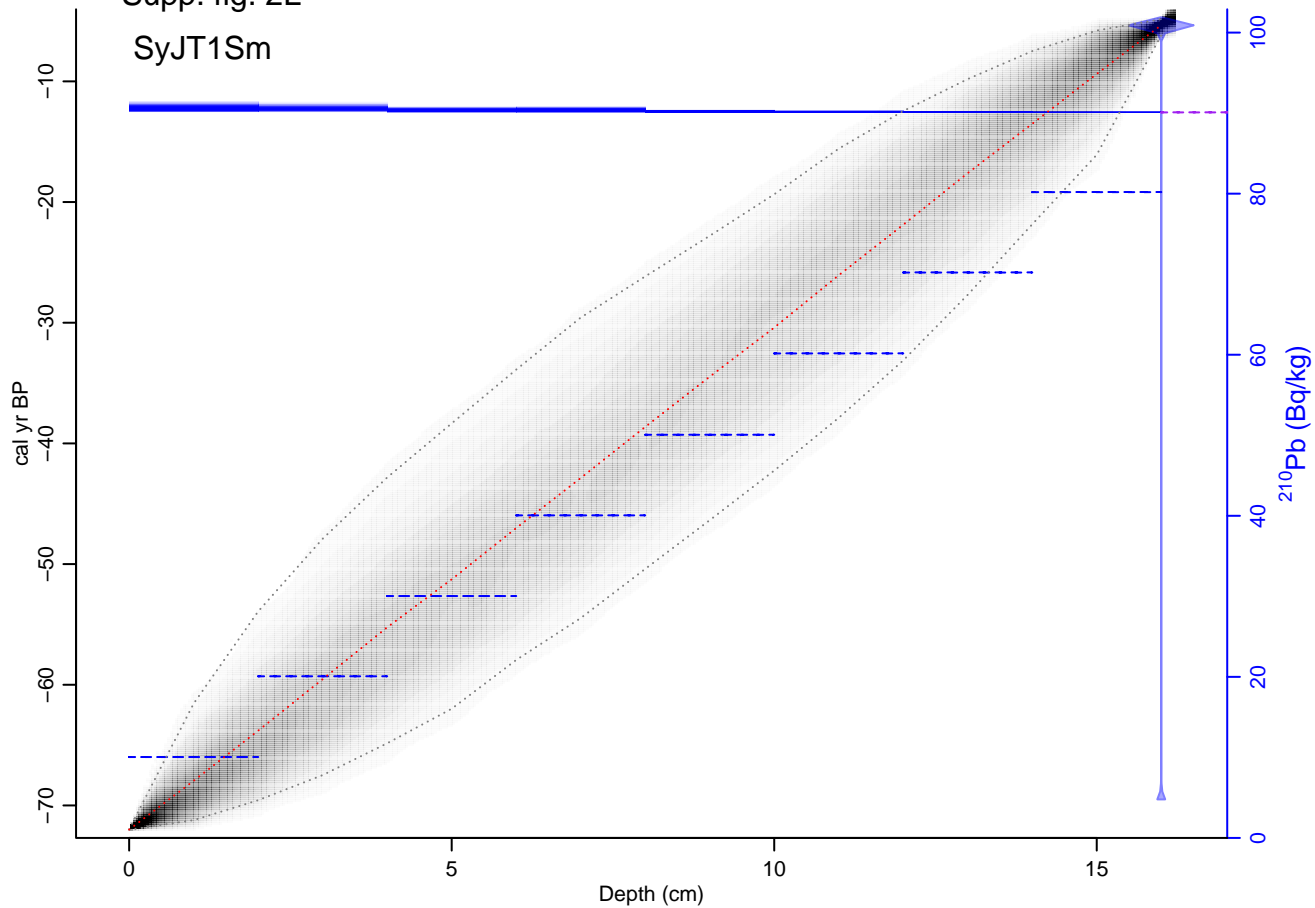

# Lompolovuoma transect 1

LVT1Sm

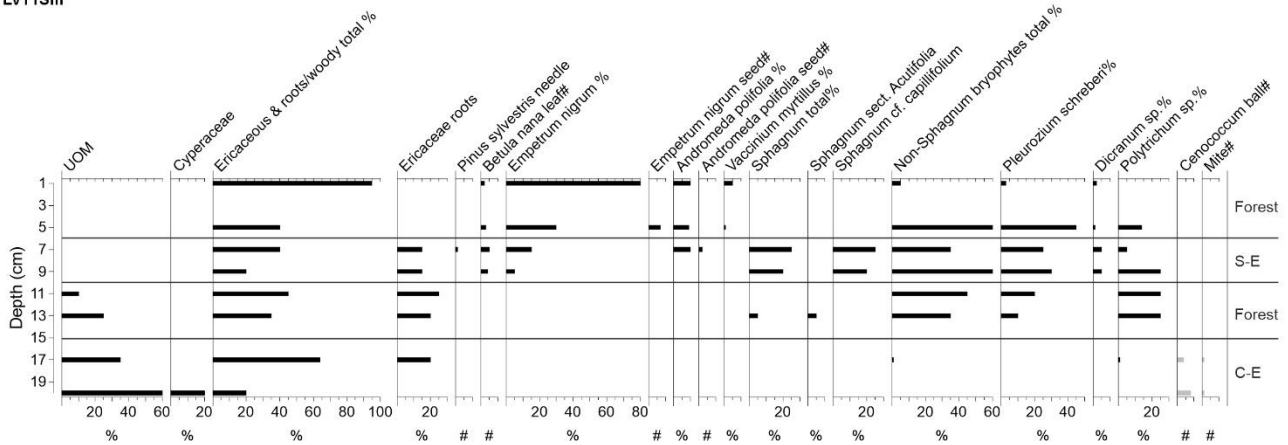

LVT1Si

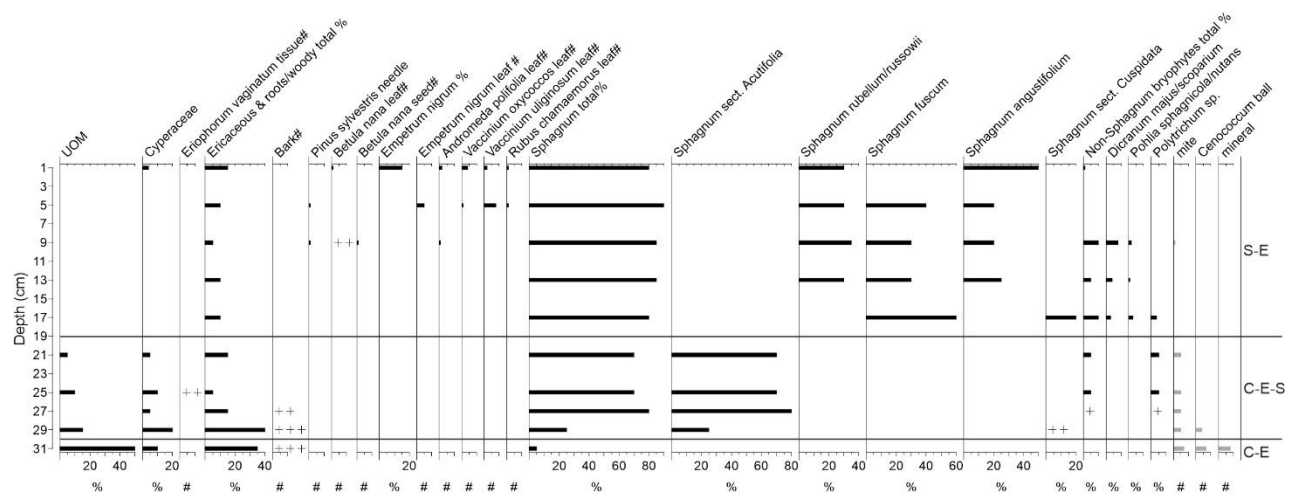

LVT1Sp

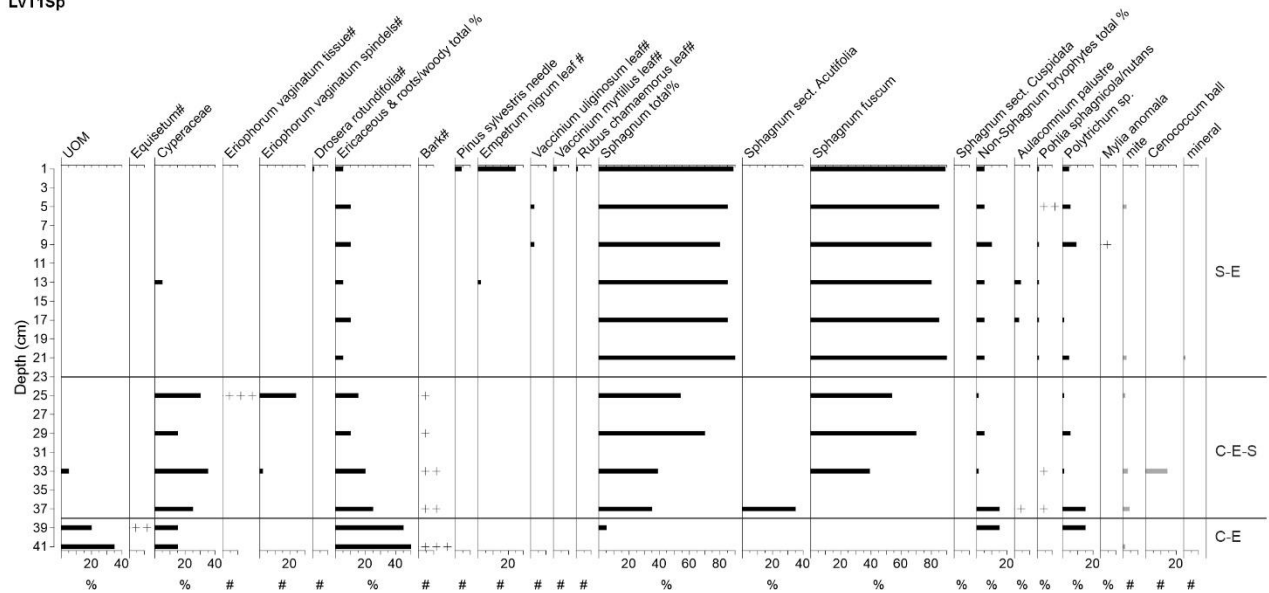

Supplementary figure 3a. Macrofossil data for peat profiles in transect 1. Unrecognized organic matter (UOM), and plant species or species groups are presented as well as remains of mites, Cenococcum, and mineral content.

# Lompolovuoma transect 2

LVT2Sm

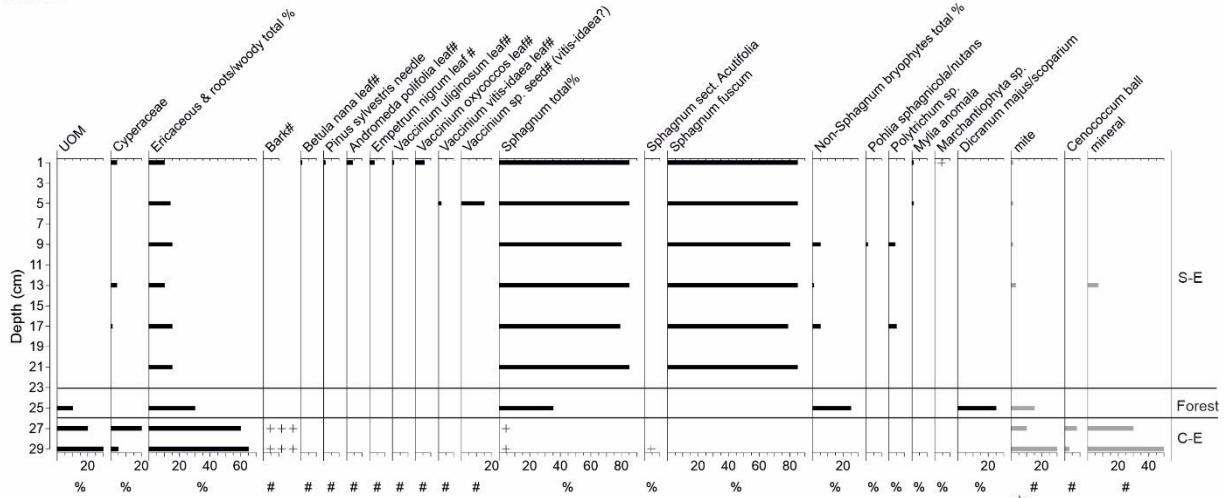

LVT2Si

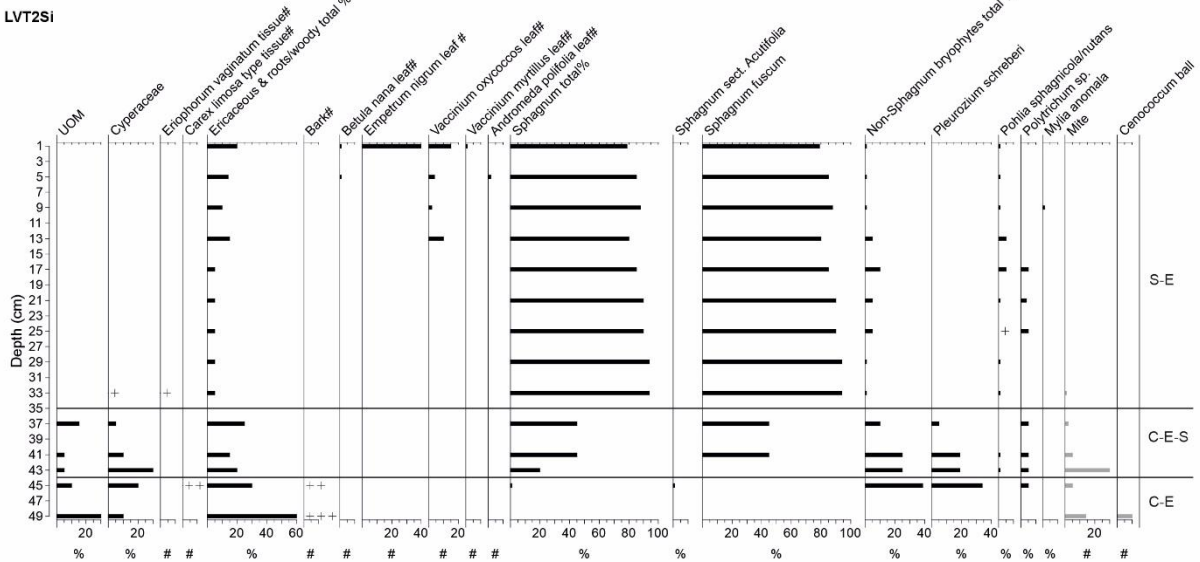

LVT2Sp

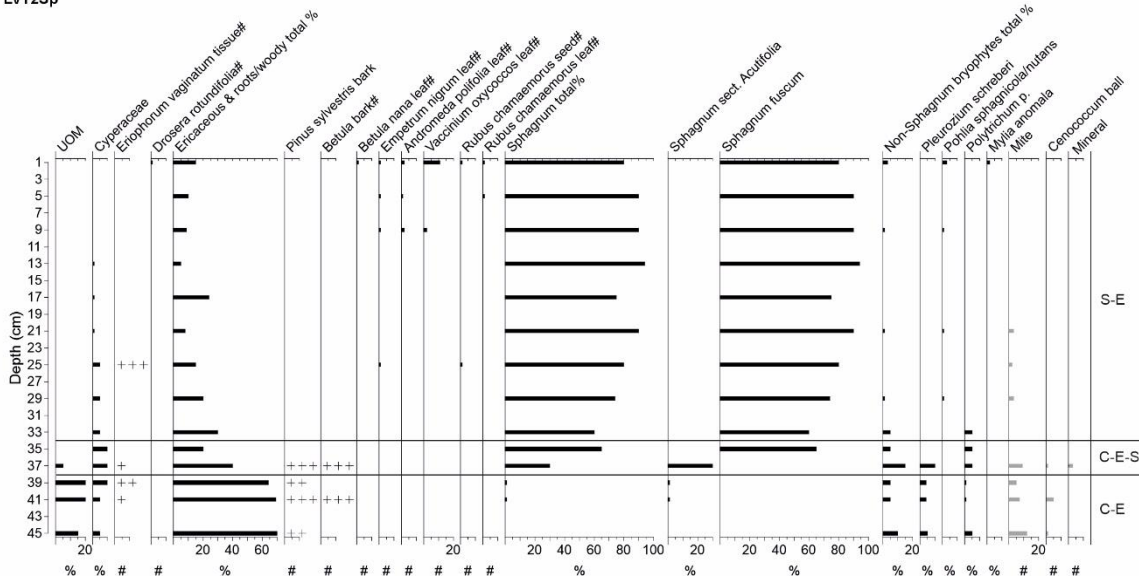

Supplementary figure 3b. Macrofossil data for peat profiles in transect 2. Unrecognized organic matter (UOM), and plant species or species groups are presented as well as remains of mites, Cenococcum, and mineral content.

# Lompolovuoma transect 3

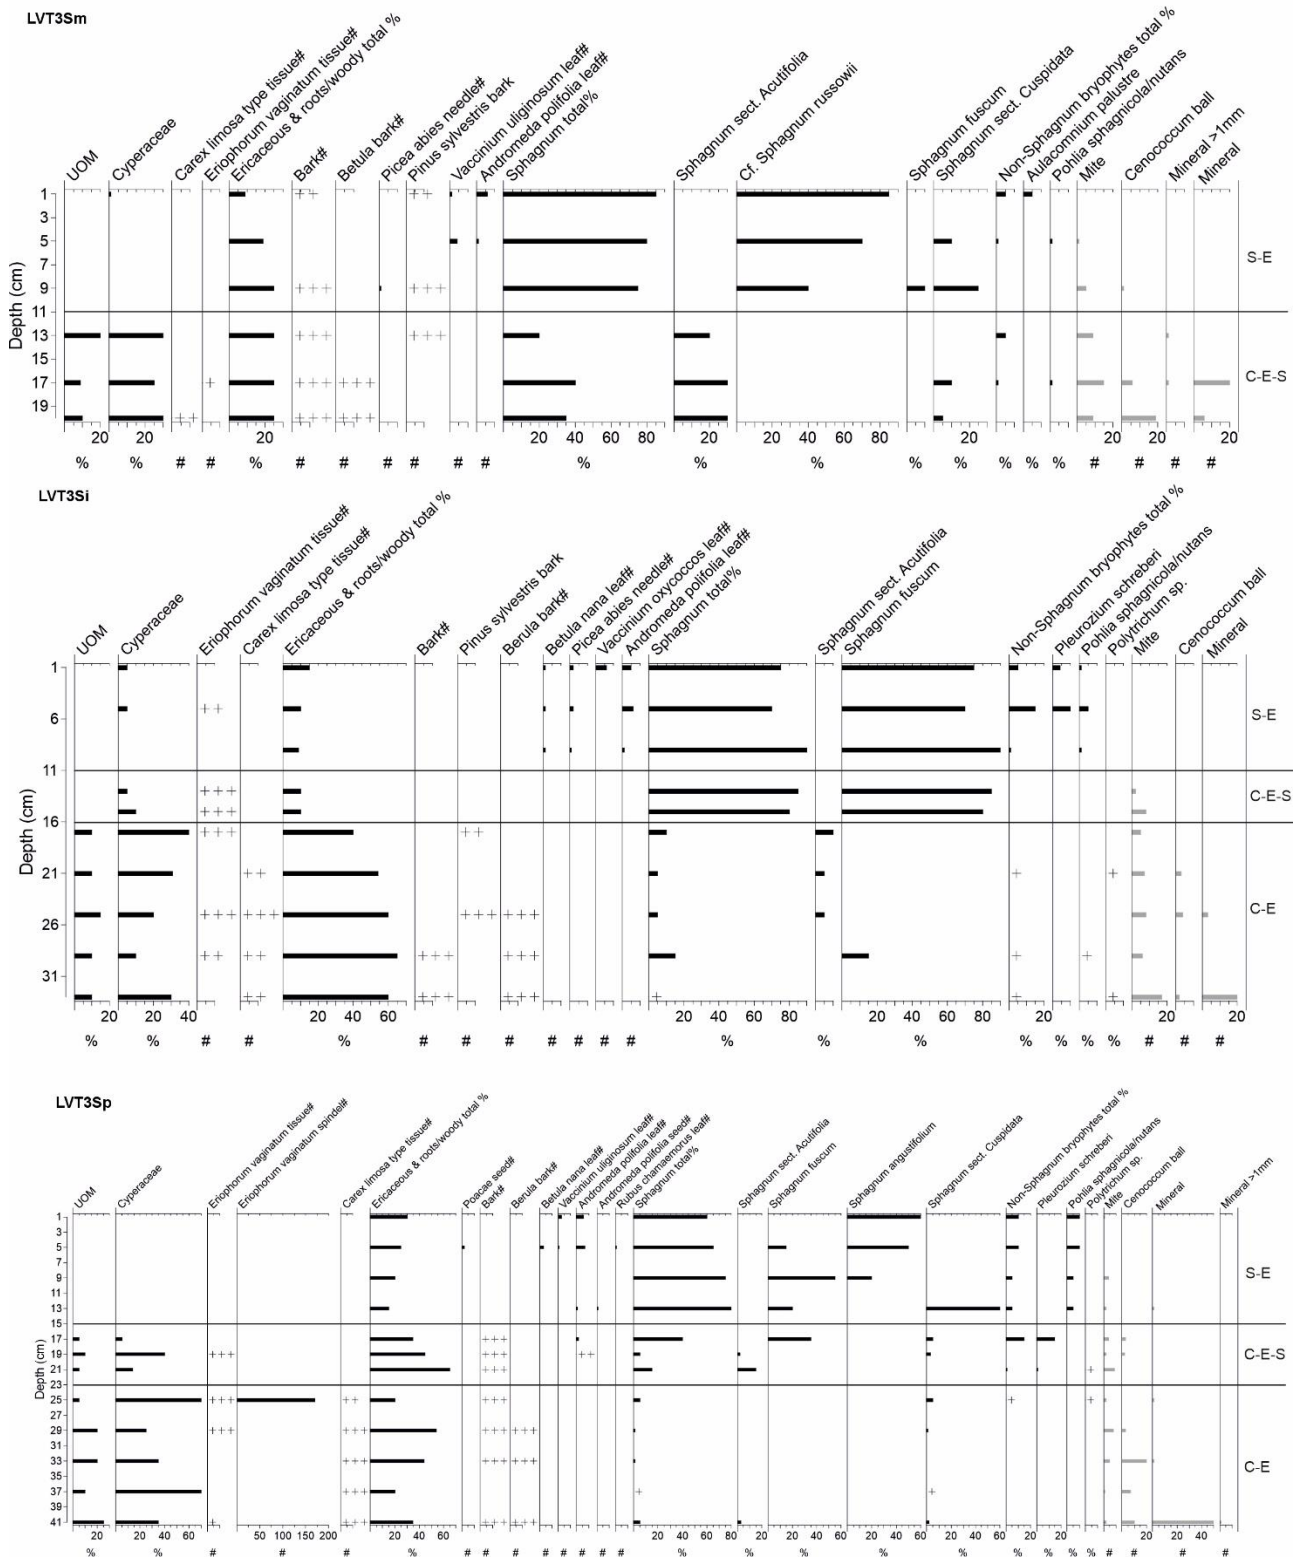

Supplementary figure 3c. Macrofossil data for peat profiles in transect 3. Unrecognized organic matter (UOM), and plant species or species groups are presented as well as remains of mites, Cenococcum, and mineral content.
